# Supplementary material for: Salt content of sauces in the UK and China: cross-sectional surveys
Source: PubMed Central journal article supplement (PMC6773338; doi:10.1136/bmjopen-2018-025623), 2019-09-23
Supplement: bmjopen-2018-025623supp001.pdf [file bmjopen-2018-025623supp001.pdf]

**Supplementary table 1.** Description of the sauce categories with the corresponding salt targets set by the UK Department of Health (DoH).

| Sauce categories            | Description                                                                                                                                                                                                                                          | Examples                                         | Salt targets (g/100g)                                                              |      |     |       |      |       |      |
|-----------------------------|------------------------------------------------------------------------------------------------------------------------------------------------------------------------------------------------------------------------------------------------------|--------------------------------------------------|------------------------------------------------------------------------------------|------|-----|-------|------|-------|------|
|                             |                                                                                                                                                                                                                                                      |                                                  | UK DoH's categories                                                                | 2010 |     | 2012  |      | 2017  |      |
|                             |                                                                                                                                                                                                                                                      |                                                  |                                                                                    | avg  | max | avg   | max  | avg   | max  |
| <b>Salad dressings</b>      | Mixtures based on oil and vinegar, with possible addition of seasoning.                                                                                                                                                                              | Vinaigrette, French/ Thousand Island Dressing    | 14.5 Salad dressing                                                                |      | 2.5 |       | 1.75 |       | 1.5  |
| <b>Salad creams</b>         | Based on mayonnaise, cream, or a cooked sauce containing eggs.                                                                                                                                                                                       | Salad cream, Caesar Dressing                     | 14.3 Salad cream                                                                   |      | 1.8 |       | 1.75 |       | 1.58 |
| <b>Pasta sauces</b>         | Any sauces to be used on spaghetti or other kinds of pasta.                                                                                                                                                                                          | Bolognese / Carbonara / Tomato Pasta Sauce       | 15.1 All cook in and pasta sauces (except pesto and other thick sauces and pastes) | 1.1  |     | 0.83* |      | 0.75* | 0.93 |
| <b>Ketchups</b>             | Sweet puree of tomatoes, onions, and green peppers.                                                                                                                                                                                                  | Heinz Tomato Ketchup                             | 14.1 Tomato ketchup                                                                |      | 2.4 |       | 1.83 |       | 1.7  |
| <b>Barbecue sauces</b>      | Tomato paste-, mayonnaise-, or vinegar-based, usually used on barbecued food.                                                                                                                                                                        | Jack Daniels Smokey BBQ Sauce                    | 14.2 Brown sauce                                                                   |      | 1.5 |       | 1.5  |       | 1.2  |
| <b>Vinegars</b>             | Acetic acid-containing sour liquid made from apples, grapes, rice, etc.                                                                                                                                                                              | Red Wine / Balsamic / Apple Cider / Rice Vinegar | N/A                                                                                |      |     |       |      |       |      |
| <b>Light soy sauces</b>     | Thin cook-in and table sauce made by brewing ('fermented') or hydrolysis ('chemical') of soybeans. Excludes tamari and Kepjap Manis.                                                                                                                 | Lee Kum Kee Premium Light Soy Sauce              | N/A                                                                                |      |     |       |      |       |      |
| <b>Dark soy sauces</b>      | Darker, thicker, and less salty cook-in soy sauce obtained by prolonged ageing.                                                                                                                                                                      | Amoy Dark Soy Sauce                              | N/A                                                                                |      |     |       |      |       |      |
| <b>Chilli sauces</b>        | Spicy sauce containing chilli.                                                                                                                                                                                                                       | Maggi Extra Hot Chilli Sauce                     | N/A                                                                                |      |     |       |      |       |      |
| <b>Hoisin sauces</b>        | Thick, sweet and spicy cook-in or table sauce mainly made from soybeans.                                                                                                                                                                             | Lee Kum Kee Hoisin Sauce                         | 15.2 Pesto and other thick sauces                                                  | 3    |     | 1.5*  | 2    | 1.38* | 1.63 |
| <b>Bean pastes</b>          | Savoury or spicy fermented paste made from salted soybeans.                                                                                                                                                                                          | Lee Kum Kee Black Bean Garlic Sauce              | 15.3 Thick pastes                                                                  |      |     |       | 5    | 3.25* | 3.75 |
| <b>Stocks (as sold)</b>     | Dehydrated broth. To match Chinese products, this survey included cubes, granules, free powders (including pure MSG, a crystalline powder produced by bacterial fermentation) and excluded stock pots, reduction jellies, and ready-to-use products. | Knorr Vegetable Stock Pot                        | N/A‡                                                                               |      |     |       |      |       |      |
| <b>Mayonnaises</b>          | Thick emulsion of raw egg yolks and oil. Excludes reduced fat/calorie versions.                                                                                                                                                                      | Hellmann's Real Mayonnaise                       | 14.4.1 Mayonnaise (not reduced fat/calorie)                                        |      | 1.5 |       | 1.25 |       | 1.25 |
| <b>Low-fat mayonnaises</b>  | Thick emulsion of raw egg yolks and oil. Only reduced fat/calorie versions.                                                                                                                                                                          | Hellmann's Light Mayonnaise                      | 14.4.2 Mayonnaise (reduced fat/calorie only)                                       |      | 2.5 |       | 1.88 |       | 1.7  |
| <b>Curry pastes</b>         | Sticky, concentrated blend of vegetables and spices; base for curry.                                                                                                                                                                                 | Mae Ploy Red Curry Paste                         | 15.3 Thick pastes                                                                  |      |     |       | 5    | 3.25* | 3.75 |
| <b>Curry cooking sauces</b> | Similar to curry pastes, but prepared into a ready-to-use liquid sauce.                                                                                                                                                                              | Uncle Ben's Medium Curry Sauce                   | 15.1 All cook in and pasta sauces (except pesto and other thick sauces and pastes) | 1.1  |     | 0.83* |      | 0.75* | 0.93 |
| <b>Oyster sauces</b>        | Viscous cook-in sauce containing oyster essence or extract.                                                                                                                                                                                          | Lee Kum Kee Premium Oyster Sauce                 | 15.2 Pesto and other thick sauces                                                  | 3    |     | 1.5*  | 2    | 1.38* | 1.63 |
| <b>Marinades</b>            | Savoury sauce in which meat, fish, or vegetables are soaked to enrich flavour or tenderise.                                                                                                                                                          | Blue Dragon Teriyaki Marinade                    | N/A                                                                                |      |     |       |      |       |      |

avg = average; max = maximum; MSG = monosodium glutamate

\*average r: to be calculated on a sales-weighted basis.

‡The salt target set for the category '28.1 Stocks, as consumed' is not applicable here as it is meant for made-up product, as opposed to unprepared stocks, 'as sold'.

**Supplementary table 2.** Salt content (g/100g or ml) of sauces in China and UK, per category, 2008-18 (per year), change in median salt content of UK product over the years.

|         |        | Vinegars |    | Dark soy sauces |       | Light soy sauces |       |       | Oyster sauces |    | Stocks (as sold) |    |     | Marinades |    | Curry cooking sauces |        | Bean pastes |    | Hoisin sauces |      |
|---------|--------|----------|----|-----------------|-------|------------------|-------|-------|---------------|----|------------------|----|-----|-----------|----|----------------------|--------|-------------|----|---------------|------|
|         |        | CN       | UK | CN              | UK    | CN               | UK    | UK†   | CN            | UK | CN               | UK | UK† | CN        | UK | CN                   | UK     | CN          | UK | CN            | UK   |
| 2007-08 | min    |          |    |                 | 14.00 |                  | 9.00  | 13.25 |               |    |                  |    |     |           |    |                      |        |             |    |               | 1.70 |
|         | Q1     |          |    |                 | 14.09 |                  | 14.04 | 14.50 |               |    |                  |    |     |           |    |                      |        |             |    |               | 2.40 |
|         | median |          |    |                 | 14.25 |                  | 15.50 | 16.67 |               |    |                  |    |     |           |    |                      |        |             |    |               | 3.40 |
|         | Q3     |          |    |                 | 15.00 |                  | 17.88 | 18.00 |               |    |                  |    |     |           |    |                      |        |             |    |               | 3.47 |
|         | max    |          |    |                 | 17.20 |                  | 22.50 | 22.50 |               |    |                  |    |     |           |    |                      |        |             |    |               | 3.80 |
|         | mean   |          |    |                 | 14.91 |                  | 15.89 | 16.60 |               |    |                  |    |     |           |    |                      |        |             |    |               | 2.96 |
|         | sd     |          |    |                 | 1.34  |                  | 3.28  | 2.65  |               |    |                  |    |     |           |    |                      |        |             |    |               | 0.88 |
|         | n      |          |    |                 | 5.00  |                  | 19.00 | 17.00 |               |    |                  |    |     |           |    |                      |        |             |    |               | 5.00 |
| 2009    | min    |          |    |                 |       |                  |       |       |               |    |                  |    |     |           |    |                      |        |             |    |               |      |
|         | Q1     |          |    |                 |       |                  |       |       |               |    |                  |    |     |           |    |                      |        |             |    |               |      |
|         | median |          |    |                 |       |                  |       |       |               |    |                  |    |     |           |    |                      |        |             |    |               |      |
|         | Q3     |          |    |                 |       |                  |       |       |               |    |                  |    |     |           |    |                      |        |             |    |               |      |
|         | max    |          |    |                 |       |                  |       |       |               |    |                  |    |     |           |    |                      |        |             |    |               |      |
|         | mean   |          |    |                 |       |                  |       |       |               |    |                  |    |     |           |    |                      |        |             |    |               |      |
|         | sd     |          |    |                 |       |                  |       |       |               |    |                  |    |     |           |    |                      |        |             |    |               |      |
|         | n      |          |    |                 |       |                  |       |       |               |    |                  |    |     |           |    |                      |        |             |    |               |      |
| 2010    | min    |          |    |                 |       |                  |       |       |               |    |                  |    |     |           |    |                      | 0.10   |             |    |               |      |
|         | Q1     |          |    |                 |       |                  |       |       |               |    |                  |    |     |           |    |                      | 0.70   |             |    |               |      |
|         | median |          |    |                 |       |                  |       |       |               |    |                  |    |     |           |    |                      | 0.80   |             |    |               |      |
|         | Q3     |          |    |                 |       |                  |       |       |               |    |                  |    |     |           |    |                      | 1.00   |             |    |               |      |
|         | max    |          |    |                 |       |                  |       |       |               |    |                  |    |     |           |    |                      | 4.00   |             |    |               |      |
|         | mean   |          |    |                 |       |                  |       |       |               |    |                  |    |     |           |    |                      | 0.91   |             |    |               |      |
|         | sd     |          |    |                 |       |                  |       |       |               |    |                  |    |     |           |    |                      | 0.58   |             |    |               |      |
|         | n      |          |    |                 |       |                  |       |       |               |    |                  |    |     |           |    |                      | 186.00 |             |    |               |      |

|         |        | Curry pastes |       | Pasta sauces |        | Ketchups |       |       | Barbecue sauces |       | Chilli sauces |      | Salad dressings |    | Salad creams |    | Mayonnaises |    | Low-fat mayo. |    |
|---------|--------|--------------|-------|--------------|--------|----------|-------|-------|-----------------|-------|---------------|------|-----------------|----|--------------|----|-------------|----|---------------|----|
|         |        | CN           | UK    | CN           | UK     | CN       | UK    | UK†   | CN              | UK    | CN            | UK   | CN              | UK | CN           | UK | CN          | UK | CN            | UK |
| 2007-08 | min    |              |       |              |        |          | 1.08  | 1.08  |                 |       |               | 2.50 | 0.25            |    | 0.80         |    | 1.30        |    | 1.80          |    |
|         | Q1     |              |       |              |        |          | 2.02  | 2.32  |                 |       |               | 2.86 | 1.30            |    | 1.80         |    | 1.30        |    | 2.25          |    |
|         | median |              |       |              |        |          | 2.65  | 2.81  |                 |       |               | 3.50 | 1.67            |    | 2.10         |    | 1.50        |    | 2.30          |    |
|         | Q3     |              |       |              |        |          | 3.08  | 3.10  |                 |       |               | 3.59 | 2.30            |    | 2.65         |    | 1.50        |    | 2.50          |    |
|         | max    |              |       |              |        |          | 3.50  | 3.50  |                 |       |               | 4.10 | 3.00            |    | 3.10         |    | 2.05        |    | 2.80          |    |
|         | mean   |              |       |              |        |          | 2.44  | 2.59  |                 |       |               | 3.29 | 1.69            |    | 2.14         |    | 1.48        |    | 2.31          |    |
|         | sd     |              |       |              |        |          | 0.78  | 0.72  |                 |       |               | 0.56 | 0.78            |    | 0.67         |    | 0.23        |    | 0.27          |    |
|         | n      |              |       |              |        |          | 14.00 | 12.00 |                 |       |               | 7.00 | 13.00           |    | 15.00        |    | 10.00       |    | 11.00         |    |
| 2009    | min    |              |       |              | 0.10   |          |       |       |                 |       |               |      |                 |    |              |    |             |    |               |    |
|         | Q1     |              |       |              | 0.59   |          |       |       |                 |       |               |      |                 |    |              |    |             |    |               |    |
|         | median |              |       |              | 0.80   |          |       |       |                 |       |               |      |                 |    |              |    |             |    |               |    |
|         | Q3     |              |       |              | 1.00   |          |       |       |                 |       |               |      |                 |    |              |    |             |    |               |    |
|         | max    |              |       |              | 3.00   |          |       |       |                 |       |               |      |                 |    |              |    |             |    |               |    |
|         | mean   |              |       |              | 0.83   |          |       |       |                 |       |               |      |                 |    |              |    |             |    |               |    |
|         | sd     |              |       |              | 0.40   |          |       |       |                 |       |               |      |                 |    |              |    |             |    |               |    |
|         | n      |              |       |              | 200.00 |          |       |       |                 |       |               |      |                 |    |              |    |             |    |               |    |
| 2010    | min    |              | 0.97  |              |        |          | 0.40  | 0.43  |                 | 0.80  |               |      |                 |    |              |    |             |    |               |    |
|         | Q1     |              | 2.00  |              |        |          | 0.93  | 0.98  |                 | 1.03  |               |      |                 |    |              |    |             |    |               |    |
|         | median |              | 3.30  |              |        |          | 1.10  | 1.10  |                 | 1.23  |               |      |                 |    |              |    |             |    |               |    |
|         | Q3     |              | 3.40  |              |        |          | 2.03  | 1.90  |                 | 1.81  |               |      |                 |    |              |    |             |    |               |    |
|         | max    |              | 5.65  |              |        |          | 3.10  | 3.10  |                 | 2.50  |               |      |                 |    |              |    |             |    |               |    |
|         | mean   |              | 2.84  |              |        |          | 1.47  | 1.49  |                 | 1.44  |               |      |                 |    |              |    |             |    |               |    |
|         | sd     |              | 1.09  |              |        |          | 0.80  | 0.79  |                 | 0.63  |               |      |                 |    |              |    |             |    |               |    |
|         | n      |              | 27.00 |              |        |          | 22.00 | 20.00 |                 | 10.00 |               |      |                 |    |              |    |             |    |               |    |

CN=China; UK=United Kingdom  
excluding reduced-salt products.

Supplementary table 2. Cont.

|      |        | Vinegars |      | Dark soy sauces |    | Light soy sauces |    |     | Oyster sauces |      | Stocks (as sold) |       |      | Marinades |       | Curry cooking sauces |    | Bean pastes |    | Hoisin sauces |    |  |
|------|--------|----------|------|-----------------|----|------------------|----|-----|---------------|------|------------------|-------|------|-----------|-------|----------------------|----|-------------|----|---------------|----|--|
|      |        | CN       | UK   | CN              | UK | CN               | UK | UK† | CN            | UK   | CN               | UK    | UK†  | CN        | UK    | CN                   | UK | CN          | UK | CN            | UK |  |
| 2011 | min    |          |      |                 |    |                  |    |     |               |      |                  |       |      |           |       |                      |    |             |    |               |    |  |
|      | Q1     |          |      |                 |    |                  |    |     |               |      |                  |       |      |           |       |                      |    |             |    |               |    |  |
|      | median |          |      |                 |    |                  |    |     |               |      |                  |       |      |           |       |                      |    |             |    |               |    |  |
|      | Q3     |          |      |                 |    |                  |    |     |               |      |                  |       |      |           |       |                      |    |             |    |               |    |  |
|      | max    |          |      |                 |    |                  |    |     |               |      |                  |       |      |           |       |                      |    |             |    |               |    |  |
|      | mean   |          |      |                 |    |                  |    |     |               |      |                  |       |      |           |       |                      |    |             |    |               |    |  |
|      | sd     |          |      |                 |    |                  |    |     |               |      |                  |       |      |           |       |                      |    |             |    |               |    |  |
| 2012 | min    |          |      |                 |    |                  |    |     |               |      |                  |       |      |           |       |                      |    |             |    |               |    |  |
|      | Q1     |          |      |                 |    |                  |    |     |               |      |                  |       |      |           |       |                      |    |             |    |               |    |  |
|      | median |          |      |                 |    |                  |    |     |               |      |                  |       |      |           |       |                      |    |             |    |               |    |  |
|      | Q3     |          |      |                 |    |                  |    |     |               |      |                  |       |      |           |       |                      |    |             |    |               |    |  |
|      | max    |          |      |                 |    |                  |    |     |               |      |                  |       |      |           |       |                      |    |             |    |               |    |  |
|      | mean   |          |      |                 |    |                  |    |     |               |      |                  |       |      |           |       |                      |    |             |    |               |    |  |
|      | sd     |          |      |                 |    |                  |    |     |               |      |                  |       |      |           |       |                      |    |             |    |               |    |  |
| 2013 | min    |          | 0.00 |                 |    |                  |    |     |               |      | 14.00            | 14.00 |      | 0.28      |       | 0.40                 |    |             |    |               |    |  |
|      | Q1     |          | 0.00 |                 |    |                  |    |     |               |      | 15.00            | 15.00 |      | 0.73      |       | 0.69                 |    |             |    |               |    |  |
|      | median |          | 0.00 |                 |    |                  |    |     |               |      | 15.00            | 15.00 |      | 1.13      |       | 0.73                 |    |             |    |               |    |  |
|      | Q3     |          | 0.00 |                 |    |                  |    |     |               |      | 15.76            | 15.76 |      | 1.56      |       | 0.80                 |    |             |    |               |    |  |
|      | max    |          | 0.10 |                 |    |                  |    |     |               |      | 16.65            | 16.65 |      | 2.00      |       | 0.95                 |    |             |    |               |    |  |
|      | mean   |          | 0.02 |                 |    |                  |    |     |               |      | 15.28            | 15.28 |      | 1.14      |       | 0.71                 |    |             |    |               |    |  |
|      | sd     |          | 0.04 |                 |    |                  |    |     |               |      | 0.99             | 0.99  |      | 0.62      |       | 0.16                 |    |             |    |               |    |  |
| n    |        | 11.00    |      |                 |    |                  |    |     |               | 5.00 | 5.00             |       | 7.00 |           | 24.00 |                      |    |             |    |               |    |  |

|      |        | Curry pastes |      | Pasta sauces |      | Ketchups |      |      | Barbecue sauces |      | Chilli sauces |       | Salad dressings |       | Salad creams |       | Mayonnaises |    | Low-fat mayo. |    |  |  |
|------|--------|--------------|------|--------------|------|----------|------|------|-----------------|------|---------------|-------|-----------------|-------|--------------|-------|-------------|----|---------------|----|--|--|
|      |        | CN           | UK   | CN           | UK   | CN       | UK   | UK†  | CN              | UK   | CN            | UK    | CN              | UK    | CN           | UK    | CN          | UK | CN            | UK |  |  |
| 2011 | min    |              |      |              |      |          |      |      |                 |      |               |       |                 |       |              |       |             |    |               |    |  |  |
|      | Q1     |              |      |              |      |          |      |      |                 |      |               |       |                 |       |              |       |             |    |               |    |  |  |
|      | median |              |      |              |      |          |      |      |                 |      |               |       |                 |       |              |       |             |    |               |    |  |  |
|      | Q3     |              |      |              |      |          |      |      |                 |      |               |       |                 |       |              |       |             |    |               |    |  |  |
|      | max    |              |      |              |      |          |      |      |                 |      |               |       |                 |       |              |       |             |    |               |    |  |  |
|      | mean   |              |      |              |      |          |      |      |                 |      |               |       |                 |       |              |       |             |    |               |    |  |  |
|      | sd     |              |      |              |      |          |      |      |                 |      |               |       |                 |       |              |       |             |    |               |    |  |  |
| 2012 | min    |              |      |              | 0.10 |          |      |      |                 |      |               |       |                 |       |              |       |             |    |               |    |  |  |
|      | Q1     |              |      |              | 0.39 |          |      |      |                 |      |               |       |                 |       |              |       |             |    |               |    |  |  |
|      | median |              |      |              | 0.60 |          |      |      |                 |      |               |       |                 |       |              |       |             |    |               |    |  |  |
|      | Q3     |              |      |              | 1.10 |          |      |      |                 |      |               |       |                 |       |              |       |             |    |               |    |  |  |
|      | max    |              |      |              | 1.82 |          |      |      |                 |      |               |       |                 |       |              |       |             |    |               |    |  |  |
|      | mean   |              |      |              | 0.75 |          |      |      |                 |      |               |       |                 |       |              |       |             |    |               |    |  |  |
|      | sd     |              |      |              | 0.45 |          |      |      |                 |      |               |       |                 |       |              |       |             |    |               |    |  |  |
| n    |        |              |      | 30.00        |      |          |      |      |                 |      |               |       |                 |       |              |       |             |    |               |    |  |  |
| 2013 | min    |              | 0.97 |              | 0.20 |          | 0.20 | 0.20 |                 |      | 0.60          |       | 0.00            |       | 0.80         |       | 0.48        |    |               |    |  |  |
|      | Q1     |              | 1.20 |              | 0.51 |          | 0.75 | 0.75 |                 |      | 0.85          |       | 0.85            |       | 1.03         |       | 0.94        |    |               |    |  |  |
|      | median |              | 2.29 |              | 0.69 |          | 0.90 | 0.90 |                 |      | 2.38          |       | 1.30            |       | 1.28         |       | 1.05        |    |               |    |  |  |
|      | Q3     |              | 3.00 |              | 0.80 |          | 0.90 | 0.90 |                 |      | 3.80          |       | 1.52            |       | 1.60         |       | 1.30        |    |               |    |  |  |
|      | max    |              | 4.20 |              | 1.70 |          | 1.33 | 1.33 |                 |      | 6.43          |       | 2.20            |       | 2.70         |       | 1.80        |    |               |    |  |  |
|      | mean   |              | 2.34 |              | 0.70 |          | 0.82 | 0.82 |                 |      | 2.67          |       | 1.20            |       | 1.39         |       | 1.14        |    |               |    |  |  |
|      | sd     |              | 1.17 |              | 0.25 |          | 0.37 | 0.37 |                 |      | 2.27          |       | 0.48            |       | 0.45         |       | 0.35        |    |               |    |  |  |
| n    |        | 14.00        |      | 66.00        |      | 6.00     | 6.00 |      |                 | 7.00 |               | 27.00 |                 | 18.00 |              | 16.00 |             |    |               |    |  |  |

CN=China; UK=United Kingdom  
 †excluding reduced-salt products.

Supplementary table 2. Cont.

|      |        | Vinegars |      | Dark soy sauces |       | Light soy sauces |       |       | Oyster sauces |    | Stocks (as sold) |       |       | Marinades |       | Curry cooking sauces |       | Bean pastes |      | Hoisin sauces |    |
|------|--------|----------|------|-----------------|-------|------------------|-------|-------|---------------|----|------------------|-------|-------|-----------|-------|----------------------|-------|-------------|------|---------------|----|
|      |        | CN       | UK   | CN              | UK    | CN               | UK    | UK†   | CN            | UK | CN               | UK    | UK†   | CN        | UK    | CN                   | UK    | CN          | UK   | CN            | UK |
| 2014 | min    |          | 0.00 |                 |       |                  |       |       |               |    |                  | 8.20  | 8.20  |           |       |                      | 0.48  |             |      |               |    |
|      | Q1     |          | 0.00 |                 |       |                  |       |       |               |    |                  | 16.40 | 14.35 |           |       |                      | 0.71  |             |      |               |    |
|      | median |          | 0.00 |                 |       |                  |       |       |               |    |                  | 20.65 | 23.55 |           |       |                      | 0.78  |             |      |               |    |
|      | Q3     |          | 0.08 |                 |       |                  |       |       |               |    |                  | 30.70 | 31.70 |           |       |                      | 1.18  |             |      |               |    |
|      | max    |          | 0.10 |                 |       |                  |       |       |               |    |                  | 34.70 | 34.70 |           |       |                      | 2.60  |             |      |               |    |
|      | mean   |          | 0.03 |                 |       |                  |       |       |               |    |                  | 22.13 | 22.50 |           |       |                      | 0.99  |             |      |               |    |
|      | sd     |          | 0.05 |                 |       |                  |       |       |               |    |                  | 10.73 | 12.35 |           |       |                      | 0.50  |             |      |               |    |
|      | n      |          | 6.00 |                 |       |                  |       |       |               |    |                  | 5.00  | 4.00  |           |       |                      | 18.00 |             |      |               |    |
| 2015 | min    | 0.00     | 0.10 | 10.70           |       | 6.88             |       |       | 10.32         |    | 1.67             | 14.00 | 14.00 |           | 0.28  |                      | 0.33  | 2.08        | 0.50 | 5.88          |    |
|      | Q1     | 0.45     | 0.10 | 16.08           |       | 15.92            |       |       | 11.06         |    | 37.59            | 15.00 | 15.00 |           | 1.20  |                      | 0.70  | 6.85        | 0.50 | 7.37          |    |
|      | median | 1.18     | 0.10 | 18.49           |       | 16.95            |       |       | 11.31         |    | 43.22            | 38.50 | 38.50 |           | 1.40  |                      | 0.73  | 10.47       | 0.50 | 7.68          |    |
|      | Q3     | 1.76     | 0.10 | 20.36           |       | 18.39            |       |       | 13.20         |    | 47.28            | 40.50 | 40.50 |           | 1.72  |                      | 0.80  | 13.16       | 0.66 | 8.97          |    |
|      | max    | 19.79    | 0.10 | 26.13           |       | 22.50            |       |       | 13.75         |    | 59.42            | 41.50 | 41.50 |           | 2.58  |                      | 1.60  | 32.00       | 0.81 | 11.74         |    |
|      | mean   | 1.41     | 0.10 | 18.46           |       | 17.21            |       |       | 11.94         |    | 40.58            | 29.90 | 29.90 |           | 1.42  |                      | 0.74  | 11.49       | 0.60 | 8.37          |    |
|      | sd     | 2.02     | NA   | 3.30            |       | 2.53             |       |       | 1.24          |    | 11.43            | 14.10 | 14.10 |           | 0.62  |                      | 0.16  | 6.60        | 0.18 | 1.79          |    |
|      | n      | 107.00   | 1.00 | 34.00           |       | 54.00            |       |       | 19.00         |    | 55.00            | 5.00  | 5.00  |           | 12.00 |                      | 88.00 | 122.00      | 3.00 | 19.00         |    |
| 2016 | min    | 0.02     |      | 13.10           | 13.30 | 12.03            | 14.30 | 14.30 |               |    | 12.92            |       |       |           | 0.28  |                      | 0.43  | 3.64        | 0.81 |               |    |
|      | Q1     | 0.80     |      | 16.95           | 13.78 | 15.75            | 14.38 | 14.38 |               |    | 38.87            |       |       |           | 1.36  |                      | 0.69  | 6.64        | 1.09 |               |    |
|      | median | 1.32     |      | 20.13           | 14.25 | 16.80            | 14.45 | 14.45 |               |    | 50.00            |       |       |           | 1.90  |                      | 0.73  | 7.75        | 1.38 |               |    |
|      | Q3     | 1.97     |      | 24.90           | 14.93 | 18.25            | 14.53 | 14.53 |               |    | 52.50            |       |       |           | 2.34  |                      | 0.84  | 10.28       | 1.84 |               |    |
|      | max    | 8.50     |      | 24.90           | 15.60 | 21.20            | 14.60 | 14.60 |               |    | 57.50            |       |       |           | 5.13  |                      | 1.30  | 20.00       | 2.30 |               |    |
|      | mean   | 1.54     |      | 20.00           | 14.38 | 16.82            | 14.45 | 14.45 |               |    | 45.26            |       |       |           | 2.23  |                      | 0.79  | 8.80        | 1.50 |               |    |
|      | sd     | 1.70     |      | 5.12            | 1.16  | 2.58             | 0.21  | 0.21  |               |    | 11.36            |       |       |           | 1.46  |                      | 0.20  | 4.03        | 0.75 |               |    |
|      | n      | 25.00    |      | 5.00            | 3.00  | 14.00            | 2.00  | 2.00  |               |    | 16.00            |       |       |           | 15.00 |                      | 40.00 | 18.00       | 3.00 |               |    |

|      |        | Curry pastes |       | Pasta sauces |        | Ketchups |       |       | Barbecue sauces |       | Chilli sauces |       | Salad dressings |       | Salad creams |       | Mayonnaises |       | Low-fat mayo. |       |
|------|--------|--------------|-------|--------------|--------|----------|-------|-------|-----------------|-------|---------------|-------|-----------------|-------|--------------|-------|-------------|-------|---------------|-------|
|      |        | CN           | UK    | CN           | UK     | CN       | UK    | UK†   | CN              | UK    | CN            | UK    | CN              | UK    | CN           | UK    | CN          | UK    | CN            | UK    |
| 2014 | min    |              | 1.30  |              | 0.30   |          | 0.30  | 0.30  |                 |       |               | 0.04  |                 |       |              | 0.70  |             | 0.90  |               | 0.79  |
|      | Q1     |              | 4.15  |              | 0.70   |          | 1.05  | 0.99  |                 |       |               | 0.71  |                 |       |              | 1.10  |             | 1.07  |               | 1.35  |
|      | median |              | 4.65  |              | 0.80   |          | 1.45  | 1.52  |                 |       |               | 1.20  |                 |       |              | 1.30  |             | 1.18  |               | 1.60  |
|      | Q3     |              | 4.70  |              | 0.90   |          | 1.80  | 1.80  |                 |       |               | 3.00  |                 |       |              | 1.63  |             | 1.46  |               | 1.70  |
|      | max    |              | 4.80  |              | 2.00   |          | 2.10  | 2.10  |                 |       |               | 6.70  |                 |       |              | 1.70  |             | 1.78  |               | 1.98  |
|      | mean   |              | 4.02  |              | 0.83   |          | 1.37  | 1.37  |                 |       |               | 2.01  |                 |       |              | 1.32  |             | 1.26  |               | 1.53  |
|      | sd     |              | 1.36  |              | 0.30   |          | 0.50  | 0.51  |                 |       |               | 2.04  |                 |       |              | 0.30  |             | 0.28  |               | 0.28  |
|      | n      |              | 6.00  |              | 44.00  |          | 25.00 | 24.00 |                 |       |               | 17.00 |                 |       |              | 17.00 |             | 16.00 |               | 19.00 |
| 2015 | min    | 12.52        | 1.30  | 0.68         | 0.20   | 0.15     | 0.30  | 0.30  | 0.61            | 0.07  | 0.00          | 1.85  | 0.20            | 0.50  | 1.00         |       | 0.85        |       | 1.30          |       |
|      | Q1     | 12.52        | 2.57  | 0.90         | 0.60   | 1.01     | 1.12  | 1.10  | 0.89            | 4.13  | 0.71          | 3.83  | 1.00            | 1.55  | 1.40         |       | 1.07        |       | 1.60          |       |
|      | median | 12.52        | 3.10  | 1.12         | 0.74   | 2.53     | 1.60  | 1.60  | 1.10            | 7.50  | 1.40          | 3.93  | 1.30            | 1.91  | 1.56         |       | 1.18        |       | 1.66          |       |
|      | Q3     | 12.52        | 4.70  | 1.34         | 0.83   | 2.84     | 1.80  | 1.80  | 1.40            | 9.85  | 1.80          | 4.71  | 1.50            | 2.92  | 1.70         |       | 1.50        |       | 1.70          |       |
|      | max    | 12.52        | 4.80  | 1.55         | 2.30   | 3.45     | 2.21  | 2.21  | 1.50            | 25.00 | 8.40          | 5.44  | 2.29            | 4.13  | 2.20         |       | 1.80        |       | 1.80          |       |
|      | mean   | 12.52        | 3.41  | 1.12         | 0.78   | 2.03     | 1.43  | 1.44  | 1.09            | 7.61  | 1.87          | 3.95  | 1.30            | 2.21  | 1.56         |       | 1.27        |       | 1.62          |       |
|      | sd     | NA           | 1.15  | 0.62         | 0.28   | 1.26     | 0.50  | 0.51  | 0.33            | 4.89  | 2.00          | 1.35  | 0.45            | 0.86  | 0.29         |       | 0.29        |       | 0.16          |       |
|      | n      | 1.00         | 16.00 | 2.00         | 133.00 | 10.00    | 22.00 | 21.00 | 9.00            | 68.00 | 17.00         | 5.00  | 32.00           | 25.00 | 20.00        |       | 28.00       |       | 19.00         |       |
| 2016 | min    |              | 1.00  | 0.30         | 0.20   | 0.25     | 0.98  | 0.98  |                 |       | 0.66          | 0.59  | 4.29            | 0.78  | 2.99         | 1.20  | 1.50        | 0.96  |               | 1.60  |
|      | Q1     |              | 1.33  | 1.17         | 0.60   | 1.41     | 1.22  | 1.22  |                 |       | 3.62          | 1.25  | 4.29            | 1.02  | 2.99         | 1.37  | 1.50        | 1.16  |               | 1.60  |
|      | median |              | 1.57  | 1.31         | 0.71   | 2.58     | 1.65  | 1.65  |                 |       | 5.40          | 2.03  | 4.29            | 1.25  | 2.99         | 1.45  | 1.50        | 1.30  |               | 1.66  |
|      | Q3     |              | 2.32  | 1.39         | 0.81   | 2.73     | 1.73  | 1.73  |                 |       | 8.75          | 2.77  | 4.29            | 1.40  | 2.99         | 1.52  | 1.50        | 1.45  |               | 1.69  |
|      | max    |              | 2.98  | 1.52         | 2.30   | 2.88     | 2.21  | 2.21  |                 |       | 15.74         | 3.32  | 4.29            | 1.40  | 2.99         | 2.03  | 1.50        | 1.72  |               | 1.98  |
|      | mean   |              | 1.79  | 1.16         | 0.78   | 1.90     | 1.55  | 1.55  |                 |       | 6.45          | 1.94  | 4.29            | 1.19  | 2.99         | 1.48  | 1.50        | 1.31  |               | 1.68  |
|      | sd     |              | 0.74  | 0.45         | 0.30   | 1.44     | 0.40  | 0.40  |                 |       | 4.03          | 0.92  | NA              | 0.23  | 0.00         | 0.25  | 0.00        | 0.24  |               | 0.11  |
|      | n      |              | 9.00  | 6.00         | 84.00  | 3.00     | 8.00  | 8.00  |                 |       | 35.00         | 15.00 | 1.00            | 10.00 | 3.00         | 8.00  | 2.00        | 11.00 |               | 10.00 |

CN=China; UK=United Kingdom  
excluding reduced-salt products.

Supplementary table 2. Cont.

|         |                                      | Vinegars |         | Dark soy sauces |       | Light soy sauces |        |        | Oyster sauces |      | Stocks (as sold) |       |       | Marinades |        | Curry cooking sauces |        | Bean pastes |        | Hoisin sauces |       |
|---------|--------------------------------------|----------|---------|-----------------|-------|------------------|--------|--------|---------------|------|------------------|-------|-------|-----------|--------|----------------------|--------|-------------|--------|---------------|-------|
|         |                                      | CN       | UK      | CN              | UK    | CN               | UK     | UK†    | CN            | UK   | CN               | UK    | UK†   | CN        | UK     | CN                   | UK     | CN          | UK     | CN            | UK    |
| 2017    | min                                  | 0.00     | 0.00    | 15.75           | 10.51 | 1.37             | 9.10   | 12.70  | 0.26          | 0.98 | 0.85             | 12.16 | 13.90 |           |        |                      | 0.30   | 1.03        | 0.73   | 1.18          | 0.65  |
|         | Q1                                   | 1.23     | 0.02    | 16.85           | 13.78 | 15.70            | 11.30  | 13.65  | 1.23          | 1.24 | 45.18            | 15.79 | 16.72 |           |        |                      | 0.66   | 10.32       | 0.73   | 4.32          | 1.05  |
|         | median                               | 1.49     | 0.07    | 18.28           | 14.70 | 17.03            | 12.70  | 14.60  | 10.92         | 1.57 | 50.00            | 18.93 | 20.61 |           |        |                      | 0.72   | 15.42       | 0.81   | 7.46          | 1.45  |
|         | Q3                                   | 1.92     | 0.10    | 20.35           | 15.70 | 17.70            | 14.60  | 15.75  | 11.56         | 3.26 | 52.50            | 37.50 | 40.90 |           |        |                      | 0.78   | 21.65       | 0.84   | 9.59          | 3.79  |
|         | max                                  | 15.25    | 0.11    | 25.32           | 19.30 | 21.20            | 16.90  | 16.90  | 13.20         | 7.65 | 60.25            | 44.60 | 44.60 |           |        |                      | 1.70   | 37.50       | 1.00   | 11.72         | 8.00  |
|         | mean                                 | 2.15     | 0.06    | 18.82           | 14.78 | 15.75            | 12.92  | 14.73  | 7.63          | 2.94 | 42.83            | 25.47 | 26.80 |           |        |                      | 0.74   | 16.50       | 0.82   | 6.79          | 2.84  |
|         | sd                                   | 2.57     | 0.05    | 2.25            | 2.67  | 4.40             | 3.00   | 2.10   | 5.79          | 3.16 | 17.49            | 13.17 | 13.08 |           |        |                      | 0.21   | 9.20        | 0.11   | 5.30          | 2.88  |
|         | n                                    | 38.00    | 4.00    | 28.00           | 7.00  | 41.00            | 5.00   | 3.00   | 8.00          | 4.00 | 27.00            | 11.00 | 10.00 |           |        |                      | 106.00 | 38.00       | 5.00   | 3.00          | 6.00  |
| 2018    | min                                  |          |         |                 | 10.51 |                  | 9.10   | 9.16   |               |      |                  |       |       |           |        |                      | 0.28   |             | 0.60   |               | 0.65  |
|         | Q1                                   |          |         |                 | 14.05 |                  | 12.30  | 12.93  |               |      |                  |       |       |           |        |                      | 1.55   |             | 0.66   |               | 1.22  |
|         | median                               |          |         |                 | 14.70 |                  | 13.00  | 13.65  |               |      |                  |       |       |           |        |                      | 2.39   |             | 0.75   |               | 1.40  |
|         | Q3                                   |          |         |                 | 15.80 |                  | 14.30  | 15.05  |               |      |                  |       |       |           |        |                      | 7.47   |             | 0.88   |               | 2.95  |
|         | max                                  |          |         |                 | 19.30 |                  | 18.70  | 18.70  |               |      |                  |       |       |           |        |                      | 11.50  |             | 1.60   |               | 8.00  |
|         | mean                                 |          |         |                 | 14.73 |                  | 13.31  | 14.03  |               |      |                  |       |       |           |        |                      | 4.50   |             | 0.80   |               | 2.45  |
|         | sd                                   |          |         |                 | 2.58  |                  | 2.72   | 2.60   |               |      |                  |       |       |           |        |                      | 4.63   |             | 0.23   |               | 2.07  |
|         | n                                    |          |         |                 | 9.00  |                  | 13.00  | 10.00  |               |      |                  |       |       |           |        |                      | 6.00   |             | 17.00  |               | 18.00 |
| 2008-18 | Fligner-Killeen test (variance)      |          | 0.4     |                 | 0.5   |                  | 0.3    | 0.3    |               | 0.9  |                  | 0.1   | 0.06  |           | 0.09   |                      | 9E-08  |             | 0.2    |               | 0.4   |
|         | Kruskall Wallis / Mood's median test |          | 0.1     |                 | 1     |                  | 0.07   | 0.1    |               | 0.7  |                  | 0.4   | 0.3   |           | 0.09   |                      | 0.002  |             | 0.008  |               | 0.8   |
|         | Significance codes                   |          | ns      |                 | ns    |                  | ns     | ns     |               | ns   |                  | ns    | ns    |           | ns     |                      | **     |             | **     |               | ns    |
|         | oldest median salt value available   |          | 0.00    |                 | 14.25 |                  | 15.50  | 16.67  |               |      |                  | 15.00 | 15.00 |           | 1.13   |                      | 0.80   |             | 3.40   |               | 1.45  |
|         | newest median salt value available   |          | 0.07    |                 | 14.70 |                  | 13.00  | 13.65  |               |      |                  | 18.93 | 20.61 |           | 2.39   |                      | 0.75   |             | 1.00   |               | 1.40  |
|         | % change in median salt content      |          | #DIV/0! |                 | 3.2%  |                  | -16.1% | -18.1% |               |      |                  | 26.2% | 37.4% |           | 111.5% |                      | -6.3%  |             | -70.6% |               | -3.1% |

|         |                                      | Curry pastes |       | Pasta sauces |        | Ketchups |        |        | Barbecue sauces |        | Chilli sauces |        | Salad dressings |        | Salad creams |        | Mayonnaises |        | Low-fat mayo. |          |
|---------|--------------------------------------|--------------|-------|--------------|--------|----------|--------|--------|-----------------|--------|---------------|--------|-----------------|--------|--------------|--------|-------------|--------|---------------|----------|
|         |                                      | CN           | UK    | CN           | UK     | CN       | UK     | UK†    | CN              | UK     | CN            | UK     | CN              | UK     | CN           | UK     | CN          | UK     | CN            | UK       |
| 2017    | min                                  |              | 1.02  | 0.90         | 0.20   | 0.19     | 0.20   | 0.32   | 0.00            | 0.71   | 0.08          | 0.55   | 0.25            | 0.20   | 0.21         | 0.90   |             | 0.75   |               | 0.79     |
|         | Q1                                   |              | 1.78  | 1.08         | 0.60   | 1.13     | 1.01   | 1.10   | 1.88            | 0.80   | 4.96          | 1.38   | 2.01            | 0.98   | 0.33         | 1.26   |             | 0.96   |               | 1.45     |
|         | median                               |              | 3.40  | 1.37         | 0.70   | 2.30     | 1.43   | 1.48   | 5.15            | 1.20   | 7.86          | 2.47   | 2.85            | 1.20   | 1.90         | 1.40   |             | 1.08   |               | 1.60     |
|         | Q3                                   |              | 4.50  | 1.42         | 0.80   | 2.68     | 1.70   | 1.70   | 5.58            | 1.40   | 9.68          | 3.85   | 3.78            | 1.43   | 2.27         | 1.57   |             | 1.19   |               | 1.68     |
|         | max                                  |              | 14.20 | 1.87         | 4.00   | 4.72     | 3.09   | 3.09   | 7.37            | 1.52   | 13.00         | 10.80  | 5.80            | 2.29   | 3.52         | 2.20   |             | 4.10   |               | 1.80     |
|         | mean                                 |              | 3.57  | 1.32         | 0.74   | 2.12     | 1.36   | 1.42   | 3.87            | 1.13   | 7.30          | 3.00   | 2.94            | 1.19   | 1.62         | 1.45   |             | 1.18   |               | 1.48     |
|         | sd                                   |              | 2.72  | 0.32         | 0.31   | 1.34     | 0.66   | 0.64   | 2.59            | 0.36   | 3.41          | 2.37   | 2.28            | 0.40   | 1.09         | 0.31   |             | 0.55   |               | 0.31     |
|         | n                                    |              | 22.00 | 11.00        | 230.00 | 9.00     | 24.00  | 22.00  | 11.00           | 6.00   | 31.00         | 36.00  | 4.00            | 49.00  | 22.00        | 34.00  |             | 36.00  |               | 17.00    |
| 2018    | min                                  |              |       |              | 0.50   |          |        |        |                 | 0.70   |               |        | 0.49            |        | 0.98         |        | 1.20        |        | 0.78          | 0.95     |
|         | Q1                                   |              |       |              | 0.66   |          |        |        |                 | 0.71   |               |        | 1.40            |        | 1.14         |        | 1.33        |        | 0.95          | 1.60     |
|         | median                               |              |       |              | 0.78   |          |        |        |                 | 0.88   |               |        | 2.55            |        | 1.29         |        | 1.45        |        | 1.03          | 1.60     |
|         | Q3                                   |              |       |              | 1.01   |          |        |        |                 | 0.93   |               |        | 3.30            |        | 1.40         |        | 1.51        |        | 1.13          | 1.66     |
|         | max                                  |              |       |              | 1.30   |          |        |        |                 | 3.40   |               |        | 6.30            |        | 1.60         |        | 1.63        |        | 1.16          | 1.69     |
|         | mean                                 |              |       |              | 0.84   |          |        |        |                 | 1.32   |               |        | 2.59            |        | 1.27         |        | 1.42        |        | 1.02          | 1.56     |
|         | sd                                   |              |       |              | 0.28   |          |        |        |                 | 1.17   |               |        | 1.54            |        | 0.19         |        | 0.15        |        | 0.13          | 0.23     |
|         | n                                    |              |       |              | 7.00   |          |        |        |                 | 5.00   |               |        | 17.00           |        | 12.00        |        | 7.00        |        | 12.00         | 9.00     |
| 2008-18 | Fligner-Killeen test (variance)      |              | 0.09  |              | 3E-13  |          | 0.2    | 0.4    |                 | 0.9    |               | 0.09   |                 | 0.0005 |              | 0.001  |             | 0.3    |               | 0.3      |
|         | Kruskall Wallis / Mood's median test |              | 0.003 |              | 0.02   |          | 0.0005 | 0.0003 |                 | 0.5    |               | 0.04   |                 | 0.8    |              | 0.07   |             | 0.0004 |               | 0.000007 |
|         | Significance codes                   |              | **    |              | *      |          | ***    | ***    |                 | ns     |               | *      |                 | ns     |              | ns     |             | ***    |               | ****     |
|         | oldest median salt value available   |              | 3.30  |              | 0.80   |          | 2.65   | 2.81   |                 | 1.23   |               | 3.50   |                 | 1.67   |              | 2.10   |             | 1.50   |               | 2.30     |
|         | newest median salt value available   |              | 3.40  |              | 0.78   |          | 1.43   | 1.48   |                 | 0.88   |               | 2.55   |                 | 1.29   |              | 1.45   |             | 1.03   |               | 1.60     |
|         | % change in median salt content      |              | 3.0%  |              | -2.5%  |          | -46.0% | -47.5% |                 | -28.5% |               | -27.1% |                 | -22.8% |              | -31.0% |             | -31.3% |               | -30.4%   |

CN=China; UK=United Kingdom

†excluding reduced-salt products.

ns P > 0.05; \* P < 0.05; \*\* P < 0.01; \*\*\* P < 0.001; \*\*\*\* P < 0.0001.

**Supplementary figure 1.** Median salt content (g/100 g or ml) of sauces in the UK, per category, 2008-2018.

The mayonnaises are categorised based on whether they are reduced in fat or calorie, not salt. Only sauce categories with five or more products per year are shown.

\* P < 0.05; \*\* P < 0.01; \*\*\* P < 0.001; \*\*\*\* P < 0.0001.

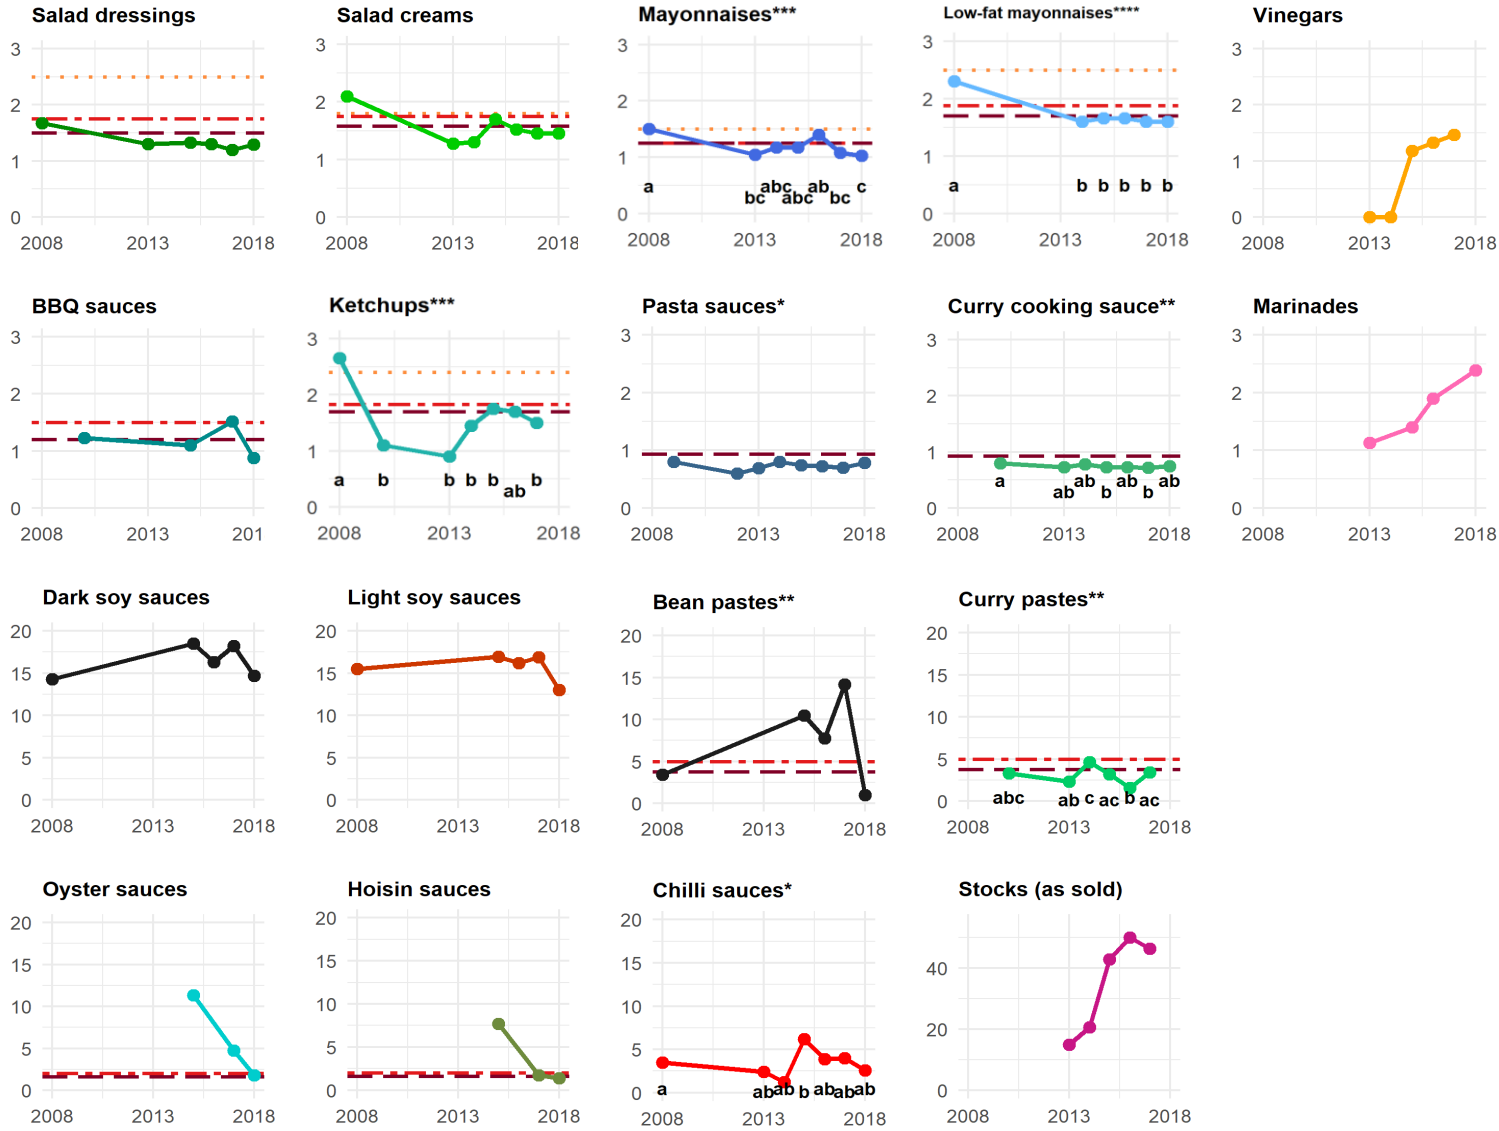

**Supplementary table 3.** Salt content (g/100g or ml) of sauces in China and UK, per category, 2015-17 (grouped years) and proportion (%) of products meeting the UK salt targets.

|         |                               | Vinegars |       | Dark soy sauces |       | Light soy sauces |       |       | Oyster sauces |       | Stocks (as sold) |       |       | Marinades |      | Curry cooking sauces |       | Bean pastes |          | Hoisin sauces |       |
|---------|-------------------------------|----------|-------|-----------------|-------|------------------|-------|-------|---------------|-------|------------------|-------|-------|-----------|------|----------------------|-------|-------------|----------|---------------|-------|
|         |                               | CN       | UK    | CN              | UK    | CN               | UK    | UK†   | CN            | UK    | CN               | UK    | UK†   | CN        | UK   | CN                   | UK    | CN          | UK       | CN            | UK    |
| 2015-17 | min                           | 0.00     | 0.00  | 10.70           | 10.51 | 1.37             | 9.10  | 12.70 | 0.26          | 0.98  | 0.85             | 12.16 | 13.90 |           | 0.28 |                      | 0.30  | 1.03        | 0.50     | 1.18          | 0.65  |
|         | Q1                            | 0.80     | 0.03  | 16.45           | 14.01 | 15.75            | 11.65 | 13.90 | 10.86         | 1.24  | 37.80            | 15.79 | 16.72 |           | 1.29 |                      | 0.68  | 7.18        | 0.73     | 7.37          | 1.05  |
|         | median                        | 1.34     | 0.10  | 18.49           | 15.15 | 16.97            | 13.50 | 14.45 | 11.30         | 1.56  | 45.55            | 22.28 | 26.49 |           | 1.60 |                      | 0.72  | 10.59       | 0.81     | 7.60          | 1.44  |
|         | Q3                            | 1.88     | 0.10  | 20.37           | 15.65 | 17.70            | 14.52 | 15.17 | 12.91         | 3.26  | 50.00            | 41.00 | 41.25 |           | 2.08 |                      | 0.80  | 14.15       | 1.00     | 9.08          | 3.79  |
|         | max                           | 19.79    | 0.11  | 26.13           | 19.30 | 22.50            | 16.90 | 16.90 | 13.75         | 7.65  | 60.25            | 44.60 | 44.60 |           | 5.13 |                      | 1.70  | 37.50       | 2.30     | 11.74         | 8.00  |
|         | mean                          | 1.60     | 0.07  | 18.72           | 14.88 | 16.61            | 13.15 | 14.63 | 10.66         | 2.94  | 41.96            | 27.65 | 28.75 |           | 1.96 |                      | 0.75  | 12.29       | 0.98     | 8.15          | 2.84  |
|         | sd                            | 2.12     | 0.05  | 3.05            | 2.49  | 3.40             | 2.74  | 1.73  | 3.76          | 3.16  | 13.33            | 13.23 | 12.98 |           | 1.28 |                      | 0.20  | 7.38        | 0.56     | 2.39          | 2.88  |
|         | n                             | 170      | 5     | 67              | 8     | 109              | 6     | 4     | 27            | 4     | 98               | 15    | 14    |           | 22   |                      | 161   | 178         | 9        | 22            | 6     |
|         | % meeting 2017 max target     |          |       |                 |       |                  |       |       | 11.1%         | 50.0% |                  |       |       |           |      |                      | 88.8% | 8.4%        | 100.0%   | 4.5%          | 50.0% |
|         | % meeting 2012 max target     |          |       |                 |       |                  |       |       | 11.1%         | 75.0% |                  |       |       |           |      |                      |       | 15.2%       | 100.0%   | 4.5%          | 66.7% |
|         | % meeting 2010 max target     |          |       |                 |       |                  |       |       |               |       |                  |       |       |           |      |                      |       |             |          |               |       |
|         | Mood's median test (CN vs UK) |          | 0.01  |                 | 0.04  |                  | 0.05  | 0.4   |               | 0.2   |                  | 0.5   | 0.6   |           |      |                      |       |             | 6.00E-09 |               | 0.05  |
|         | Significance codes            |          | *     |                 | *     |                  | §     | ns    |               | ns    |                  | ns    | ns    |           |      |                      |       |             | ****     |               | §     |
|         | Magnitude of difference       |          | 13.40 |                 | 1.22  |                  | 1.26  | 1.17  |               | 7.24  |                  | 2.04  | 1.72  |           |      |                      |       |             | 13.07    |               | 5.28  |

|         |                               | Curry pastes |       | Pasta sauces |          | Ketchups |          |          | Barbecue sauces |       | Chilli sauces |       | Salad dressings |          | Salad creams |       | Mayonnaises |       | Low-fat mayonnaises |        | All   |       |       |
|---------|-------------------------------|--------------|-------|--------------|----------|----------|----------|----------|-----------------|-------|---------------|-------|-----------------|----------|--------------|-------|-------------|-------|---------------------|--------|-------|-------|-------|
|         |                               | CN           | UK    | CN           | UK       | CN       | UK       | UK†      | CN              | UK    | CN            | UK    | CN              | UK       | CN           | UK    | CN          | UK    | CN                  | UK     | CN    | UK    | UK†   |
| 2015-17 | min                           | 12.52        | 1.00  | 0.30         | 0.20     | 0.15     | 0.20     | 0.30     | 0.00            | 0.61  | 0.07          | 0.00  | 0.25            | 0.20     | 0.21         | 0.90  | 1.50        | 0.75  |                     | 0.79   | 0.00  | 0.00  | 0.00  |
|         | Q1                            | 12.52        | 1.70  | 1.06         | 0.60     | 0.81     | 1.05     | 1.08     | 1.88            | 0.90  | 4.01          | 1.27  | 2.73            | 1.00     | 1.55         | 1.30  | 1.50        | 1.00  |                     | 1.53   | 1.97  | 0.70  | 0.70  |
|         | median                        | 12.52        | 2.75  | 1.35         | 0.70     | 2.47     | 1.45     | 1.50     | 5.15            | 1.21  | 7.25          | 2.03  | 3.88            | 1.20     | 1.90         | 1.45  | 1.50        | 1.16  |                     | 1.66   | 8.78  | 0.90  | 0.90  |
|         | Q3                            | 12.52        | 4.10  | 1.42         | 0.83     | 2.83     | 1.80     | 1.80     | 5.58            | 1.40  | 9.71          | 3.10  | 4.61            | 1.49     | 2.88         | 1.69  | 1.50        | 1.45  |                     | 1.70   | 16.96 | 1.45  | 1.45  |
|         | max                           | 12.52        | 14.20 | 1.87         | 4.00     | 4.72     | 3.09     | 3.09     | 7.37            | 1.52  | 25.00         | 10.80 | 5.80            | 2.29     | 4.13         | 2.20  | 1.50        | 4.10  |                     | 1.98   | 60.25 | 44.60 | 44.60 |
|         | mean                          | 12.52        | 3.13  | 1.25         | 0.76     | 2.05     | 1.38     | 1.41     | 3.87            | 1.14  | 7.23          | 2.61  | 3.58            | 1.22     | 2.00         | 1.48  | 1.50        | 1.26  |                     | 1.56   | 12.32 | 1.83  | 1.81  |
|         | sd                            | NA           | 2.17  | 0.37         | 0.32     | 1.25     | 0.58     | 0.57     | 2.59            | 0.32  | 4.36          | 2.14  | 1.69            | 0.39     | 1.01         | 0.29  | 0.00        | 0.46  |                     | 0.27   | 13.15 | 4.18  | 4.16  |
|         | n                             | 1            | 41    | 19           | 325      | 22       | 45       | 43       | 11              | 14    | 134           | 53    | 10              | 67       | 50           | 47    | 2           | 59    |                     | 31     | 920   | 918   | 913   |
|         | % meeting 2017 max target     | 0.0%         | 65.9% | 15.8%        | 81.8%    | 31.8%    | 71.1%    | 69.8%    | 18.2%           | 50.0% |               |       | 10.0%           | 83.6%    | 34.0%        | 68.1% | 0.0%        | 61.0% |                     | 80.6%  | 13.4% | 70.0% | 70.8% |
|         | % meeting 2012 max target     | 0.0%         | 97.6% |              |          | 31.8%    | 91.1%    | 90.7%    | 27.3%           | 92.9% |               |       | 10.0%           | 91.0%    | 36.0%        | 87.2% | 0.0%        | 61.0% |                     | 96.8%  | 15.1% | 84.7% | 85.9% |
|         | % meeting 2010 max target     |              |       |              |          | 45.5%    | 97.8%    | 93.3%    | 27.3%           | 92.9% |               |       | 20.0%           | 100.0%   | 36.0%        | 89.4% | 100.0%      | 88.1% |                     | 100.0% | 44.1% | 93.2% | 94.4% |
|         | Mood's median test (CN vs UK) |              | 0.07  |              | 8.00E-08 |          | 3.00E-07 | 3.00E-07 |                 | 0.005 |               | 0.3   |                 | 2.00E-07 |              | 0.001 |             | 0.8   |                     |        |       |       |       |
|         | Significance codes            |              | ns    |              | ****     |          | ****     | ****     |                 | **    |               | ns    |                 | ****     |              | **    |             | ns    |                     |        |       |       |       |
|         | Magnitude of difference       |              | 4.55  |              | 1.93     |          | 1.70     | 1.65     |                 | 4.26  |               | 3.57  |                 | 3.23     |              | 1.31  |             | 1.29  |                     |        |       |       |       |

CN=China; UK=United Kingdom

†excluding reduced-salt products.

ns P > 0.05; § P = 0.05; \* P < 0.05; \*\* P < 0.01; \*\*\* P < 0.001; \*\*\*\* P < 0.0001.
